# Supplementary material for: Split aptazyme-based catalytic molecular beacons for amplified detection of adenosine
Source: Royal Society of Chemistry journal article supplement (doi:10.1039/c4an00454j), 2014-01-01
Supplement: c4an00454j1.pdf [file c4an00454j1.pdf]

## Electronic Supporting Information

### Split Aptazyme-Based Catalytic Molecular Beacon for Amplified Detection of Adenosine

Jin Huang, Yong He, Xiaohai Yang, Kemin Wang\*, Ke Quan, Xiaoping Lin.

State Key Laboratory of Chemo/Biosensing and Chemometrics, College of Chemistry and Chemical Engineering, Key Laboratory for Bio-Nanotechnology and Molecular Engineering of Hunan Province, Hunan University, Changsha 410082, P. R. China

#### Chemicals and Materials

Oligonucleotides used in this work were synthesized and purified by Takara Biotechnology Co. Ltd. (Dalian, China), and their sequences are shown in Table 1 in the main text. Adenosine and the analogues were purchased from Sigma-Aldrich Chemical Co. Ltd. All work solutions were 50 mM HEPES (200 mM NaCl, pH 7.0). The pH measurements were carried out using an Orion 3 Star pH meter (Thermo Fisher, USA). All solutions were prepared with Milli-Q water (18.2 MΩ.cm) from a Millipore system.

#### Fluorescence measurement

Fluorescence measurements were carried out on a Hitachi F-7000 fluorescence spectrometer (Hitachi Ltd., Japan). The excitation wavelength was set at 494 nm (slit 5 nm), and the emission spectra were collected from 510 nm to 650 nm (slit 5 nm). The fluorescence intensity at 521 nm was used to evaluate the performances of the proposed assay strategy.

#### Procedure for conditions optimizing

- Zn<sup>2+</sup> concentration:** 0 or 1 mM adenosine were incubated with 100 nM SA1 and SA4 in the buffer with different Zn<sup>2+</sup> concentrations (50 mM HEPES, 200 mM NaCl, 10 mM MgCl<sub>2</sub>, pH 7.0) for 30 min at 25 °C. Then, 300 nM MB were added into the above solution and incubated for another 2 h. Finally, the fluorescence emission intensity at 521 nm was measured.
- Mg<sup>2+</sup> concentration:** 0 or 1 mM adenosine were incubated with 100 nM SA1 and SA4 in the buffer with different Mg<sup>2+</sup> concentrations (50 mM HEPES, 200 mM NaCl, 0.5 mM ZnCl<sub>2</sub>, pH 7.0) for 30 min at 25 °C. Then, 300 nM MB were added into the above solution and incubated for another 2 h. Finally, the fluorescence emission intensity at 521 nm was measured.
- SA sequences:** 0 or 1 mM adenosine were incubated with 100 nM different split-aptazyme pairs in the buffer (50 mM HEPES, 200 mM NaCl, 10 mM MgCl<sub>2</sub>, 0.5 mM ZnCl<sub>2</sub>, pH 7.0)

for 30 min at 25 °C. Then, 300 nM MB were added into the above solution and incubated for another 2 h. Finally, the fluorescence emission intensity at 521 nm was measured.

- 4. Concentration ratio of SA to MB:** 0 or 1 mM adenosine were incubated with 100 nM SA2 and SA6 in the buffer (50 mM HEPES , 200 mM NaCl, 10mM MgCl<sub>2</sub>, 0.5 mM ZnCl<sub>2</sub>, pH 7.0) for 30 min at 25 °C. Then, different concentrations of MB were added into the above solution and incubated for another 2 h. Finally, the fluorescence emission intensity at 521 nm was measured.

#### **Procedure for adenosine detection**

Different concentrations of adenosine were incubated with 100 nM SA2 and SA6 in the buffer (50 mM HEPES , 200 mM NaCl, 10 mM MgCl<sub>2</sub>, 0.5 mM ZnCl<sub>2</sub>, pH 7.0) for 30 min at 25 °C. Then, 400 nM MB were added into the above solution and incubated for another 2 h. Finally, the fluorescence emission intensity at 521 nm was measured.

#### **Procedure for selectivity**

Adenosine and its analogues were incubated with 100 nM SA2 and SA6 in the buffer (50 mM HEPES , 200 mM NaCl, 10 mM MgCl<sub>2</sub>, 0.5 mM ZnCl<sub>2</sub>, pH 7.0) for 30 min at 25 °C separately. Then, 400 nM MB were added into the above solution and incubated for another 2 h. Finally, the fluorescence emission intensity at 521 nm was measured.

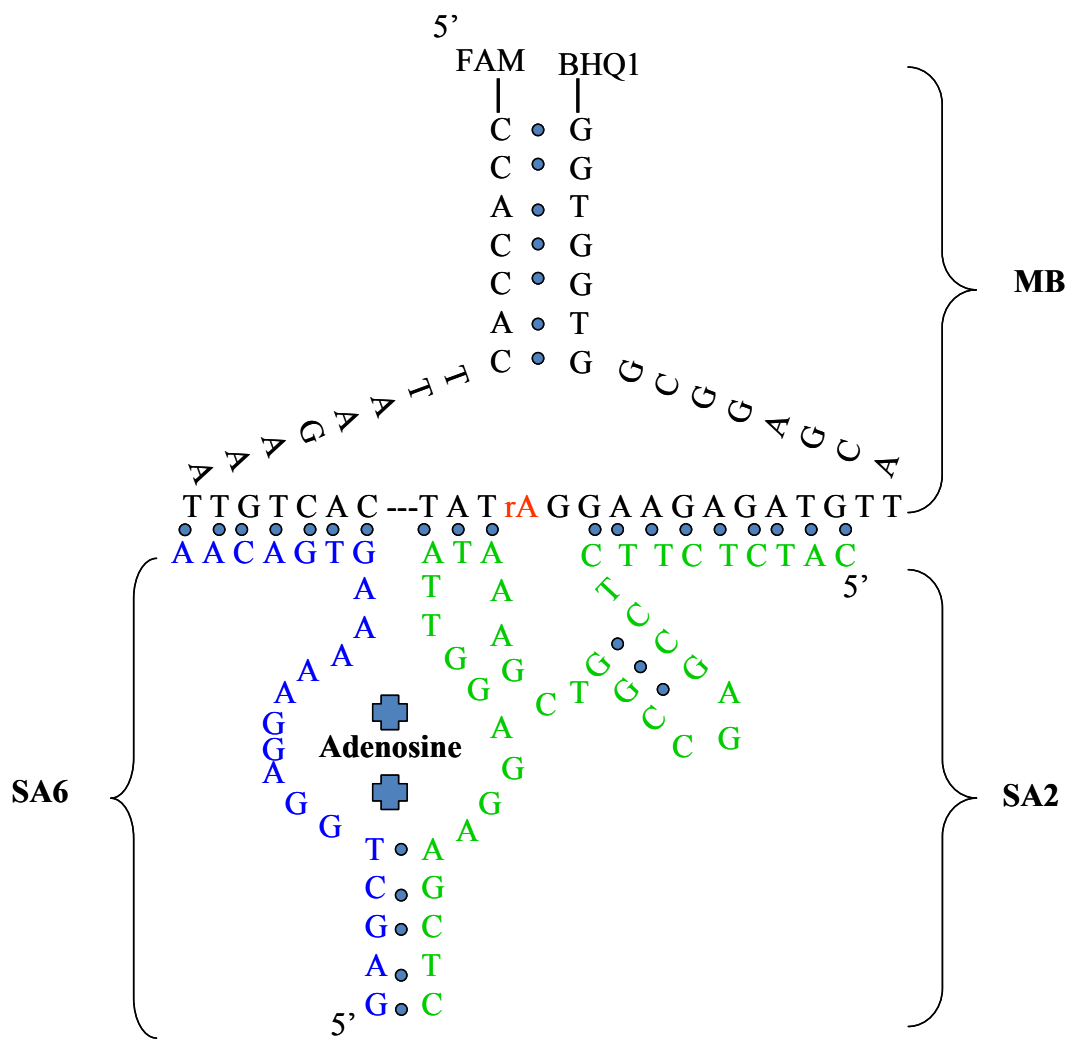

**Figure S1.** The primary and the proposed secondary structure of the adenosine detection system built on MB, SA2 and SA6.

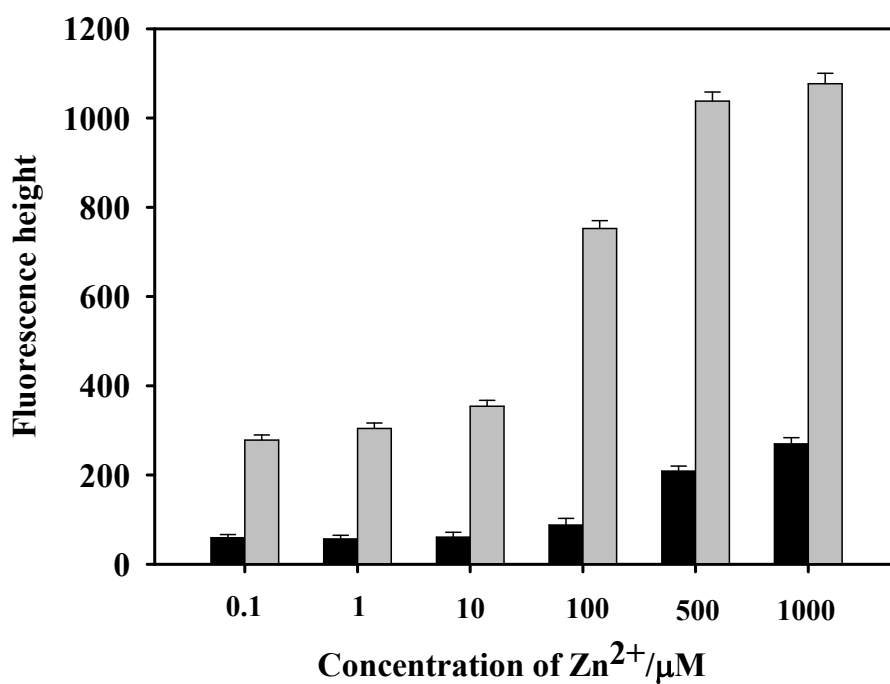

**Figure S2.** Optimization of concentration of Zn<sup>2+</sup>. (Black and gray denote fluorescence background and signal, respectively).

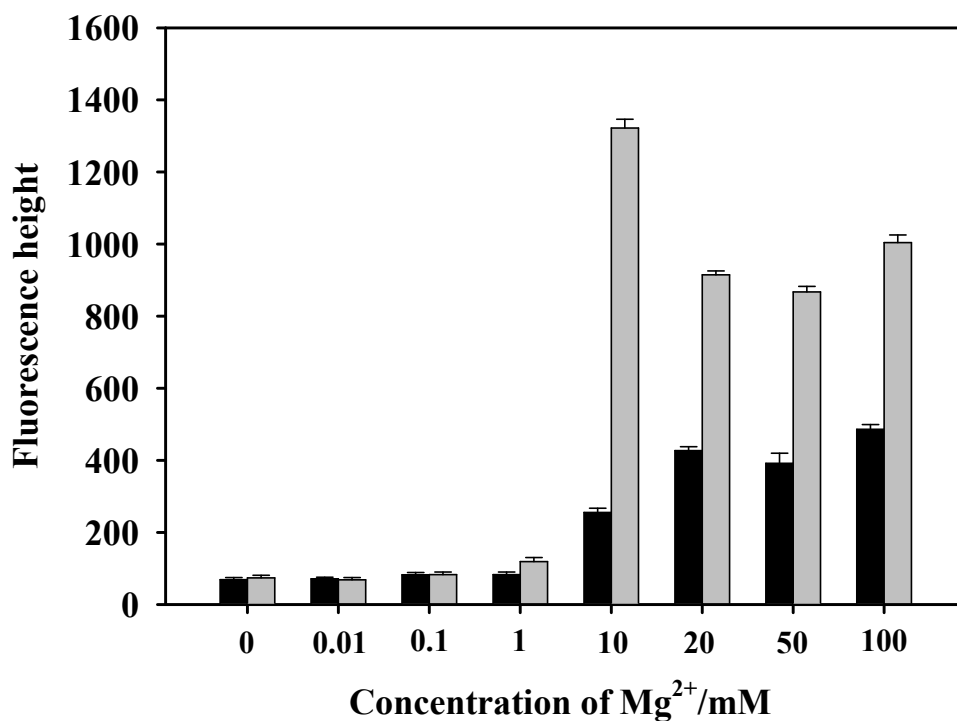

**Figure S3.** Optimization of concentration of Mg<sup>2+</sup>. (Black and gray denote fluorescence background and signal, respectively).
